# Supplementary material
Source: PubMed Central journal article supplement (PMC3600459)
Supplement: 1219847110_pnas.201219847SI.pdf [file 1219847110_pnas.201219847SI.pdf]

# Supporting Information

Hess et al. 10.1073/pnas.1219847110

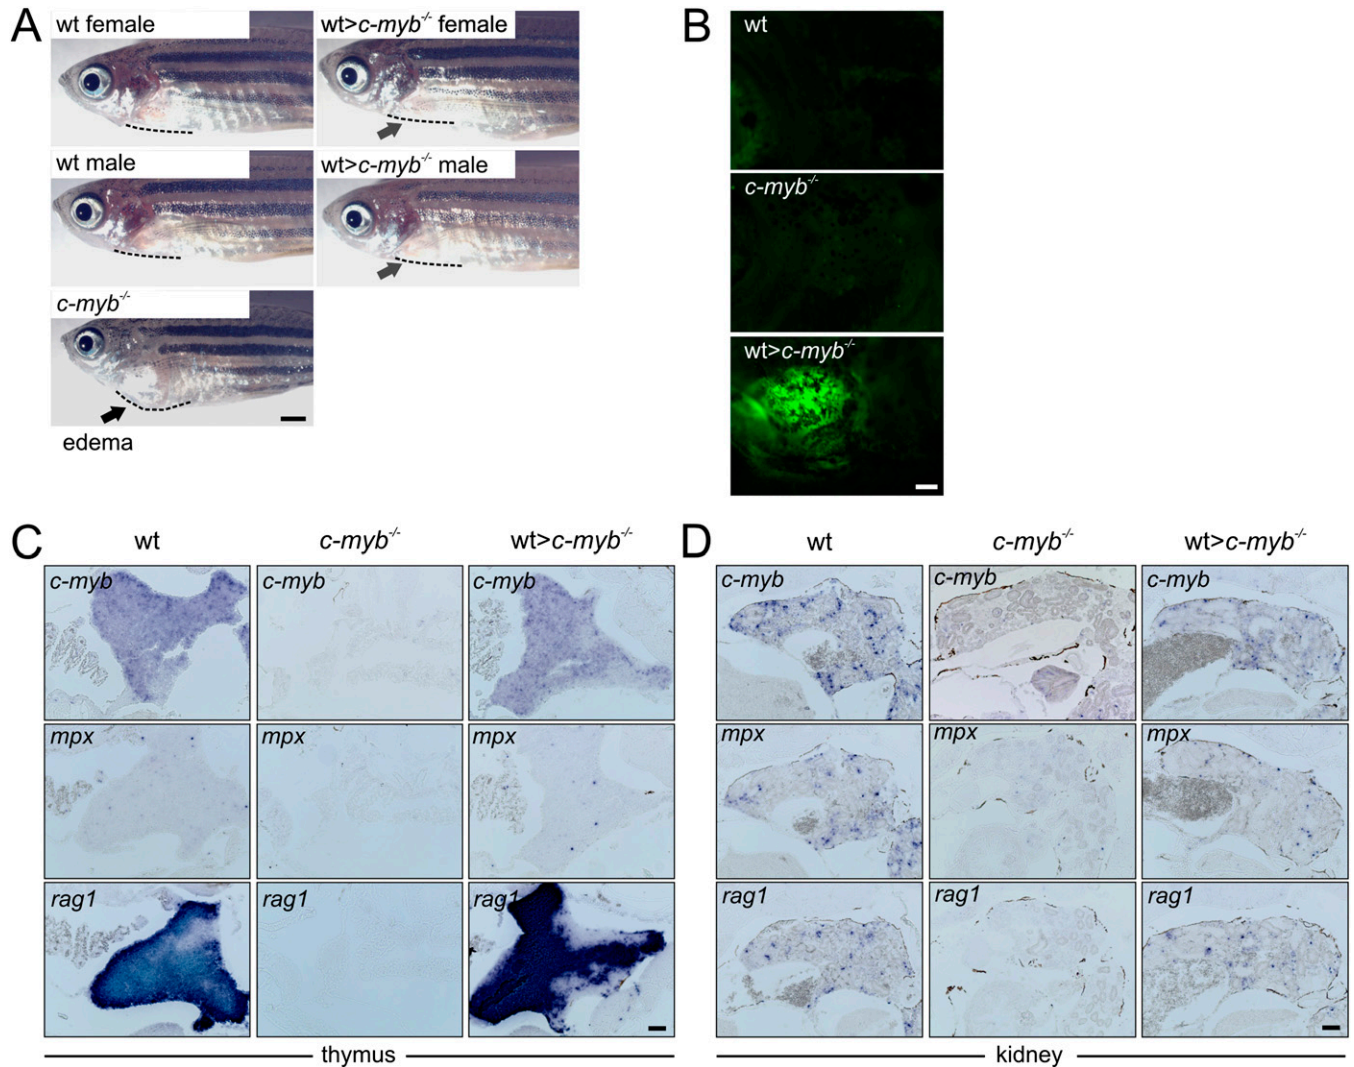

**Fig. S1.** Characterization of reconstituted *c-myb*<sup>-/-</sup> mutants. (A) Side views of wild-type, *c-myb*<sup>-/-</sup> transplant recipients and a *c-myb*<sup>-/-</sup> mutant fish. Note the absence of cardiac edema (resulting in a bulged body curvature) in the transplanted fish; the body curvature is highlighted by dotted lines. (Scale bar, 1 mm.) (B) Reconstitution of T-cell development in the thymus of *c-myb*<sup>-/-</sup> mutant recipients transplanted with *ikaros:eGFP*-transgenic wild-type whole kidney marrow (WKM) cells; note the presence of green fluorescent cells in the transplanted fish. Photographs (side views) were taken 20 d after transplantation. (Scale bar, 50  $\mu$ m.) (C and D) Whole-mount RNA in situ hybridization with *c-myb*, *mpx*, and *rag1*-specific probes on thymus (C) and kidney (D) sections of wild-type, *c-myb*<sup>-/-</sup> mutant and *c-myb*<sup>-/-</sup> transplant recipients (3 wk after transplantation). In mutant tissues, no positive cells were observed for *c-myb*, *mpx*, and *rag1*, while expression patterns in transplanted *c-myb*<sup>-/-</sup> recipients are indistinguishable from those of their wild-type siblings. *c-myb* is a general marker for hematopoietic cells; *mpx* is a marker for myeloid cells; *rag1* is a marker for developing lymphocytes. (Scale bar, 50  $\mu$ m.)

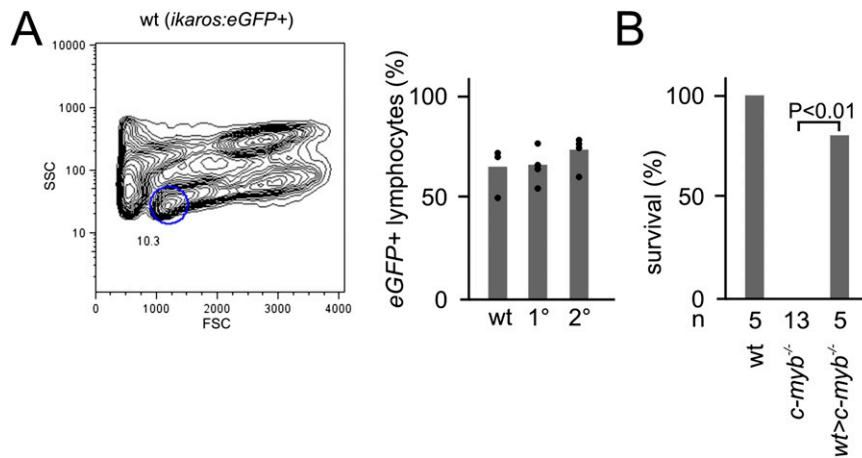

**Fig. S2.** Lack of host contributions to hematopoietic reconstitution after transplantation. (A, Left) Flow cytometric profile of WKM of wild-type *ikaros:eGFP* transgenic fish, with the position of the lymphocyte gate indicated (blue circle). FSC, forward light scatter; SSC, side light scatter. (A, Right) Percentage of green-fluorescent cells in the lymphocyte gate; each dot represents one fish, and the bar denotes average values. wt, wild-type; 1°, recipients of primary transplants, 2°, recipients of secondary transplants. (B) Survival rate of fish of the indicated genotype that were fin-clipped at the age of 8 wk.

|                       | <i>c-myb</i> | Tg( <i>ikaros:gfp</i> ) | Assam |
|-----------------------|--------------|-------------------------|-------|
| <i>mhcl ufa ex2</i>   |              |                         |       |
| <i>mhcl LOC751750</i> |              |                         |       |
| <i>mhcl ufa ex3</i>   |              |                         |       |
| <i>mhcl uda ex2</i>   |              |                         |       |
| <i>mhcl uea ex2</i>   |              |                         |       |
| <i>mhcl uxa2</i>      |              |                         |       |
| <i>mhcll DBB</i>      |              |                         |       |
| <i>mhcll DCB</i>      |              |                         |       |
| <i>mhcll DFB</i>      |              |                         |       |
| <i>mhcll DAA/BA</i>   |              |                         |       |
| <i>mhcll A20291</i>   |              |                         |       |
| <i>mhcll DAB</i>      |              |                         |       |
| <i>mhcll DDB</i>      |              |                         |       |

**Fig. S3.** Allelic diversity of *mhcl* genes in zebrafish. The diagram shows the outcome of PCR experiments for several *mhcl* and *mhcll* genes using the primer pairs listed in Table S1; seven embryos each from an in-cross of *c-myb*<sup>+/-</sup> heterozygous fish, *ikaros:eGFP*-transgenics, and Assam fish were tested. Empty boxes indicate failure of PCR, suggesting sequence diversity occurring at the primer binding site. For the PCR reactions indicated by grayish boxes, amplicons were cloned and sequenced (Fig. 4A and Fig. S3).

*mhcI\_uda*  
 NM\_131704.1:  
 GFYQDSYDGEDFVYLDLKEKRYISPPVQALLTLQKWNDDKAFLAQQINYLSEICIEWLQKYMQYKSSL

*c-myb* recipient strain:  
 GFYQDSYDGEDFVYLDLKEKRYISPPVQALLTLQKWNDDKAFLAQQINYLSEICIEWLQKYMQYKSSL  
 GFYQDSYDGEDFVYLDLKEKRYISPPVQALLTLQKWNDDKAFLAQQINYLSEICIEWLQKYMQYKSSL  
 GFYQDSYDGEDFVYLDLKEKRYISPPVQALLTLQKWNDDKAFLAQQINYLSEICIEWLQKYMQYKSSL  
 GFYQDSYDGEDFVYLDLKEKRYISPPVQALLTLQKWNDDKAFLAQQINYLSEICIEWLQKYMQYKSSL  
 GFYQDSYDGEDFVYLDLKEKRYISPPVQALLTLQKWNDDKAFLAQQRINYLSEICIEWLQKYMQYKSSL

*ikaros:eGfp* wild-type donor strain:  
 GFYQDSYDGEDFVYLDLKEKRYISPPVQALLTLQKWNDDKAFLAQQINYLSEICIEWLQKYMQYKSSL  
 GFYQDSYDGEDFVYLDLKEKRYISPPVQALLTLQKWNDDKAFLAQQINYLSEICIEWLQKYMQYKSSL  
 GFYQDSYDGEDFVYLDLKEKRYISPPVQALLTLQKWNDDKAFLAQQINYLSEICIEWLQKYMQYKSSL  
 GFYQDSYDGEDFVYLDLKEKRYISPPVQALLTLQKWNDDKAFLAQQINYLSEICIEWLQKYMQYKSSL  
 GFYQDSYDGEDFVYLDLKEKRYISPPVQALLTLQKWNDDKAFLAQQINYLSEICIEWLQKYMQYKSSL

Assam wild type donor strain:  
 GFRQEGFDGEDFLDLDELRYISPVQGGISTVQKWNDRAYLEARKHYGTLCIEWLKYYQYKSSL  
 GLNQFGYDGDLDLVLDLKEKRYISPPVQGGIVTQKWNDRAPTESRRNYLSTICIEWLKYYQYKSSL  
 GFRLEBGYDGEDLDLDFEEMRYISPAQKGFPTQSWNNYKAYLEDDKMYFSNEICIEWLKYYQYKSSL  
 GLNQFGYDGDLDLVLDLKEKRYISPPVQGGIVTQKWNDRAPTESRRNYLSTICIEWLKYYQYKSSL

*mhcI\_ufa*  
 NM\_194403.1:  
 SEIKEVIPRQEWVRGAVDEQFWQRNTQIRSNMHQLFKNNINIAMERFN

*c-myb* recipient strain:  
 SEIKEVIPRQEWVRGAVDEQFWQRNTQIRSNMHQLFKNNINIAMERFN  
 SEIKEVIPRQEWVRGAVDEQFWQRNTQIRSNMHQFPKNNINIAMERFN

*ikaros:eGfp* wild-type donor strain:  
 SEIKEVIPRQEWVRGAVDEQFWQRNTQIRSNMHQLFKNNINIAMERFN  
 SEIKEVIPRQEWVRGAVDEQLWQRNTQIRSNMHQLFKNNINIAMERFN  
 SEIKEVIPRQEWVRGAVDEQFWQRNTQIRSNHQLFKNNINIAMERFN

Assam wild type donor strain:  
 SEIKEVIPRQAWVRGAVDEQFWQRNTQIRSNTHQLFKNNINIAMERFN

*mhcII\_DBB*  
 U08869.1:  
 AYNFYPKHIKLTWRRDDKVVTDVMSTKVMADGDWYYQIHSLEYFPQPGEKISCV

*c-myb* recipient strain:  
 AYNFYPKHIKLTWRRDDKVVTDVMSTKVMADGDWYYQIHSLEYFPQPGEKISCV  
 AYNFYPKHIKLTWRRDDKVVTDVMSIKVMADGDWYYQIHSLEYFPQPGEKISCV  
 AYNFYPKHIKLTWRRDDKVVTDVMSTKVMADGDWYYQIHSLEYFPQPGKISCV

*ikaros:eGfp* wild-type donor strain:  
 AYNFYPKHIKLTWRRDDKVVTDVMSTKVMADGDWYYQIHSLEYFPQPGEKISCV  
 AYNFYPKHIKLTWRRDDKVVTDVMSTKVMADGDWYYQIHSLEYFPQPGEKISCV  
 AYNFYPKHIKLTWRRDDKVVTDVMSIKVMADGDWYYQIHSLEYFPQPGEKISCV

Assam wild type donor strain:  
 AYNFYPKHIKLTWRRDDKVVTDVMSTKVMADGDWYYQIHSLEYFPQPGEKISCV  
 AYNFYPKHIKLTWRRDDKVVTDVMSTKVMADGDWYYQIHSLEYFPQPGEKISCV  
 AYNFYPKHIKLTWRRDDKVVTDVMSIKVMADGDWYYQIHSLEYFPQPGEKISCV  
 AYNFYPKHIKLTWRRDDKVVTDVMSIKVMADGDWYYQIHSLEYFPQPGEKISCV  
 AYNFYPKHIKLTWRRDDKVVTDVMSIKVMADGDWYYQIHSLEYFPQPGEKISCV

*mhcII\_DCB*  
 NM\_131706.1:  
 VCSAYDFYPKAIKLTWRRNDKRVTDVTSIEEMADGDWYYQIHSLEYFPQPGEKISCVVHASFHKPMI

*c-myb* recipient strain:  
 VCSAYDFYPKAIKLTWRRNDKRVTDVTSIEEMADGDWYYQIHSLEYFPQPGEKISCVVHASFHKPMI  
 VCSAYDFYPKGIKLTWRRDDKVTAELETSEVMADGDWYYQIHSLEYFPQPGEKISCVVHASFHKPMI  
 VCSAYDFYPKGIKLTWRRDDKVTAELETSEVMADGHWHYQIHSLEYFPQTGEEKISCVVHASLKPFI  
 VCSAYDFYPKGIKLTWRRDDKVTAELETSEVMADGHWHYQIHSLEYFPQTGEEKISCVVHASFHKPMI  
 VCSAYDFYPKGIKLTWRRDDKVTAELETSEVMADGHWHYQIHSLEYFPQTGEEKISCVVDRASSLKPFI

*ikaros:eGfp* wild-type donor strain:  
 VCSAYDFYPKAIKLTWRRNDKRVTDVTSIEEMADGDWYYQIHSLEYFPQPGEKISCVVHASFHKPMI  
 VCSAYDFYPKAIKLTWRRNDKRVTDVTSIEEMADGDWYYQIHSLEYFPQPGKISCVVHASFHKPMI  
 VCSAYDFYPKAIKLTWRRNDKRVTDVTSIEEMADGDWYYQIHSLEYFPQPGEKISCVVHASFHKPMI  
 VCSAYDFYPKAIKLTWRRNDKRVTDVTSIEEMADGDWYYQTHSHLEYFPQPGKISCVVHASFHKPMI

Assam wild type donor strain:  
 VCSAYDFYPKAIKLTWRRNDKRVTDVTSIEEMADGDWYYQIHSLEYFPQPGEKISCVVHASFHKPMI  
 VCSAYDFYPKGIKLTWRRDDKVTAELETSEVMADGHWHYQIHSLEYFPQTGEEKISCVVHASLKPFI  
 VCSAYDFYPKGIKLTWRRDDKVTAELETSEVMADGHWHYQIHSLEYFPQTGEEKISCVVHASFHKPMI

**Fig. S4.** Diversity of *mhc* genes in zebrafish. Reference sequences (conceptual translations of nucleotide sequences) for each of the analyzed genes are shown; the identifier refers to the relevant GenBank accession number. Amino acid differences from the reference sequences are highlighted in red. The alleles found in seven individuals each of the *c-myb*-mutant background (*c-myb*) and the two wild-type donor backgrounds (*ikaros:eGFP*-transgenic, Assam) are indicated.

**Table S1. Primer sequences**

| Gene                           | Forward (5' > 3')            | Reverse (5' > 3')            |
|--------------------------------|------------------------------|------------------------------|
| <b>Globin genes</b>            |                              |                              |
| <i>α-globin</i>                | CAAGGCTGTTGTTAGGC            | GCACAGTGTGTTGTGTCAG          |
| <i>β-globin</i>                | GGCCTGTGGGAAAGCTC            | GTTGTCCGGATCCACATGCAG        |
| <b>MHC genes</b>               |                              |                              |
| <i>mhc1ufa ex2</i>             | GAAAGCATTCTCACACTGTTATCT     | GTGTTTGGTTAAAACGTTCCATTG     |
| <i>LOC751750</i>               | GAAATGTACGGCTGTGAGTG         | CAGGCTGCTCTTTCCATAC          |
| <i>mhc1ufa ex3</i>             | CAGTTCATGGTCGGCTGTGA         | AAGAATCTTTGCCGTAACCC         |
| <i>mhc1uda ex2</i>             | AGGCATACACTCTCTGAAATACTTCTTC | CCCTGTGACTGGTTAAACCTCTCC     |
| <i>mhc1uea ex2</i>             | TACACACTCCCTGAGGTACTTC       | TGTGCGCCAGTAAAGATCTGAG       |
| <i>mhc1uxa2 ex2</i>            | AGGCATACACTCTCTGAAATACTTCTTC | CCCTGTGACTGGTTAAAACCTCTCC    |
| <i>mhcII DBB</i>               | TAAAACCAGAAGTCTTTGTGCGG      | CCCAGTAATARAATCATGGGTTT      |
| <i>mhcII DCB</i>               | TGAAACCAGAAGTCATTATTCGG      | CCCAGTAATARAATCATGGGTTT      |
| <i>mhcII DFB</i>               | CAGATGGATATATTCATCCACG       | CTGCTTTATCAAAGACCGCTGA       |
| <i>mhcII DAA/BA</i>            | TAGTTGCTCTTCTGGAGAGTT        | GCTCAAGCTGAGCACAGGGAT        |
| <i>A20291/ A20290</i>          | GCTCAAGCTGAACACAAGGAT        | TTTCTCTAAAGGAGAGTTGTAGGCCCTT |
| <i>mhcII DAB</i>               | TACTACCAGAGGTAACAATCAAG      | TCCAATCTTTAGTAAGAGGTTG       |
| <i>mhcII DDB</i>               | TGAAGCCAACAGTTGTGCTCAGT      | CCCAGTAATARAATCATGGGTTT      |
| <b>TCR genes*</b>              |                              |                              |
| <i>Vd35-Cd (first)</i>         | GCTTTTACTGTAAAGGAAGAGGA      | TTTATTGATTACAAGATCAGAGCCTC   |
| <i>Vd35-Cd (second)</i>        | GAGACTGTGACCTTCAGCTG         | TTTATAGGGGACAAGACAGAC        |
| <i>Vb1.5/17.5-Cb1 (first)</i>  | AATGGACAGCTTGATAGAACTGAAC    | AAGATGACAAGGCCATACAGTC       |
| <i>Vb1.5/17.5-Cb1 (second)</i> | TGCTTATTCAACCGAACAGAAACATTC  | GTCCGCTCTTAGCAATGGTC         |
| <b>Ig genes*</b>               |                              |                              |
| <i>igVH1-Cm (first)</i>        | GATGGACGTGTACAATTTGG         | ACATGAAGGTTGCTGATCCAC        |
| <i>igVH1-Cm (second)</i>       | CCTCCTCAGACTCTGTGGTGA        | TTGCTGATCCACCTTCTAATTC       |
| <b>Miscellaneous</b>           |                              |                              |
| <i>ef1α</i>                    | TATCTCCAAGAACGGACAGAC        | GCAAACCTGCAGGCGATGTG         |
| <i>cd79b</i>                   | CAGGAACTGCACTTCAAGTATCC      | CTCATATATGTGGTCATCCTCTGG     |
| <i>lck</i>                     | TGAATACACCGCCAGAGAAGGTGC     | GAGGTTTGGCATCACCTCTGG        |

\*Amplification of rearranged antigen receptor genes was carried out in two successive rounds.
